# Supplementary material
Source: Springer Nature journal article supplement (https://www.springermedizin.de/resource/supplementary/12875_2010_536_MOESM1_ESM.pdf/9434890)
Supplement: MOESM1 [file 9434890]

**Table 1: Session attendance, by site**

| <b>Site No.</b> | <b>No. staff invited to session</b> | <b>No. staff present on feedback day (not away/on vacation)</b> | <b>No. staff attended</b> | <b>% staff attending (# attended/#present)</b> | <b>No. of surveys received</b> | <b>Response Rate of attendees</b> |
|-----------------|-------------------------------------|-----------------------------------------------------------------|---------------------------|------------------------------------------------|--------------------------------|-----------------------------------|
| 1               | 67                                  | UNK <sup>a</sup>                                                | 38                        | At least 57%*                                  | 33                             | 87%                               |
| 2               | 60                                  | UNK <sup>a</sup>                                                | 11                        | At least 18%*                                  | 11                             | 100%                              |
| 3               | 24                                  | 22                                                              | 20                        | 91%                                            | 18                             | 90%                               |
| 4               | 24                                  | 17                                                              | 17                        | 100%                                           | 13                             | 76%                               |
| 5               | 47                                  | 35                                                              | 27                        | 77%                                            | 17                             | 63%                               |
| 6               | 19                                  | 15                                                              | 15                        | 100%                                           | 14                             | 93%                               |
| 7               | UNK                                 | UNK <sup>a</sup>                                                | 31                        | At Least 47%*                                  | 28                             | 90%                               |
| <b>Total</b>    |                                     |                                                                 | 159                       |                                                | 134                            | 84%                               |

<sup>a</sup>: Unable to obtain the number of staff unavailable/away the day of the feedback session.

UNK: Unknown
